# Supplementary material for: New Species of Talaromyces (Trichocomaceae, Eurotiales) from Southwestern China
Source: MDPI journal article supplement (doi:10.3390/jof8070647), 2022-06-21
Supplement: s1 [file s1]

**Figure S1.** ML phylogeny of *Talaromyces* sect. *Talaromyces* inferred from BenA dataset. Bootstrap values  $\geq 70\%$  (left) or posterior probability values  $\geq 0.95$  (right) are indicated at nodes. Asterisk denotes 100% bootstrap or 1.00 posterior probability.

**Figure S2.** ML phylogeny of *Talaromyces* sect. *Talaromyces* inferred from CaM dataset. Bootstrap values  $\geq 70\%$  (left) or posterior probability values  $\geq 0.95$  (right) are indicated at nodes. Asterisk denotes 100% bootstrap or 1.00 posterior probability.

**Figure S3.** ML phylogeny of *Talaromyces* sect. *Talaromyces* inferred from RPB2 dataset. Bootstrap values  $\geq 70\%$  (left) or posterior probability values  $\geq 0.95$  (right) are indicated at nodes. Asterisk denotes 100% bootstrap or 1.00 posterior probability.
