# Supplementary figures and images for: New Species of Talaromyces (Trichocomaceae, Eurotiales) from Southwestern China
Source: MDPI journal article supplement (doi:10.3390/jof8070647), 2022-06-21

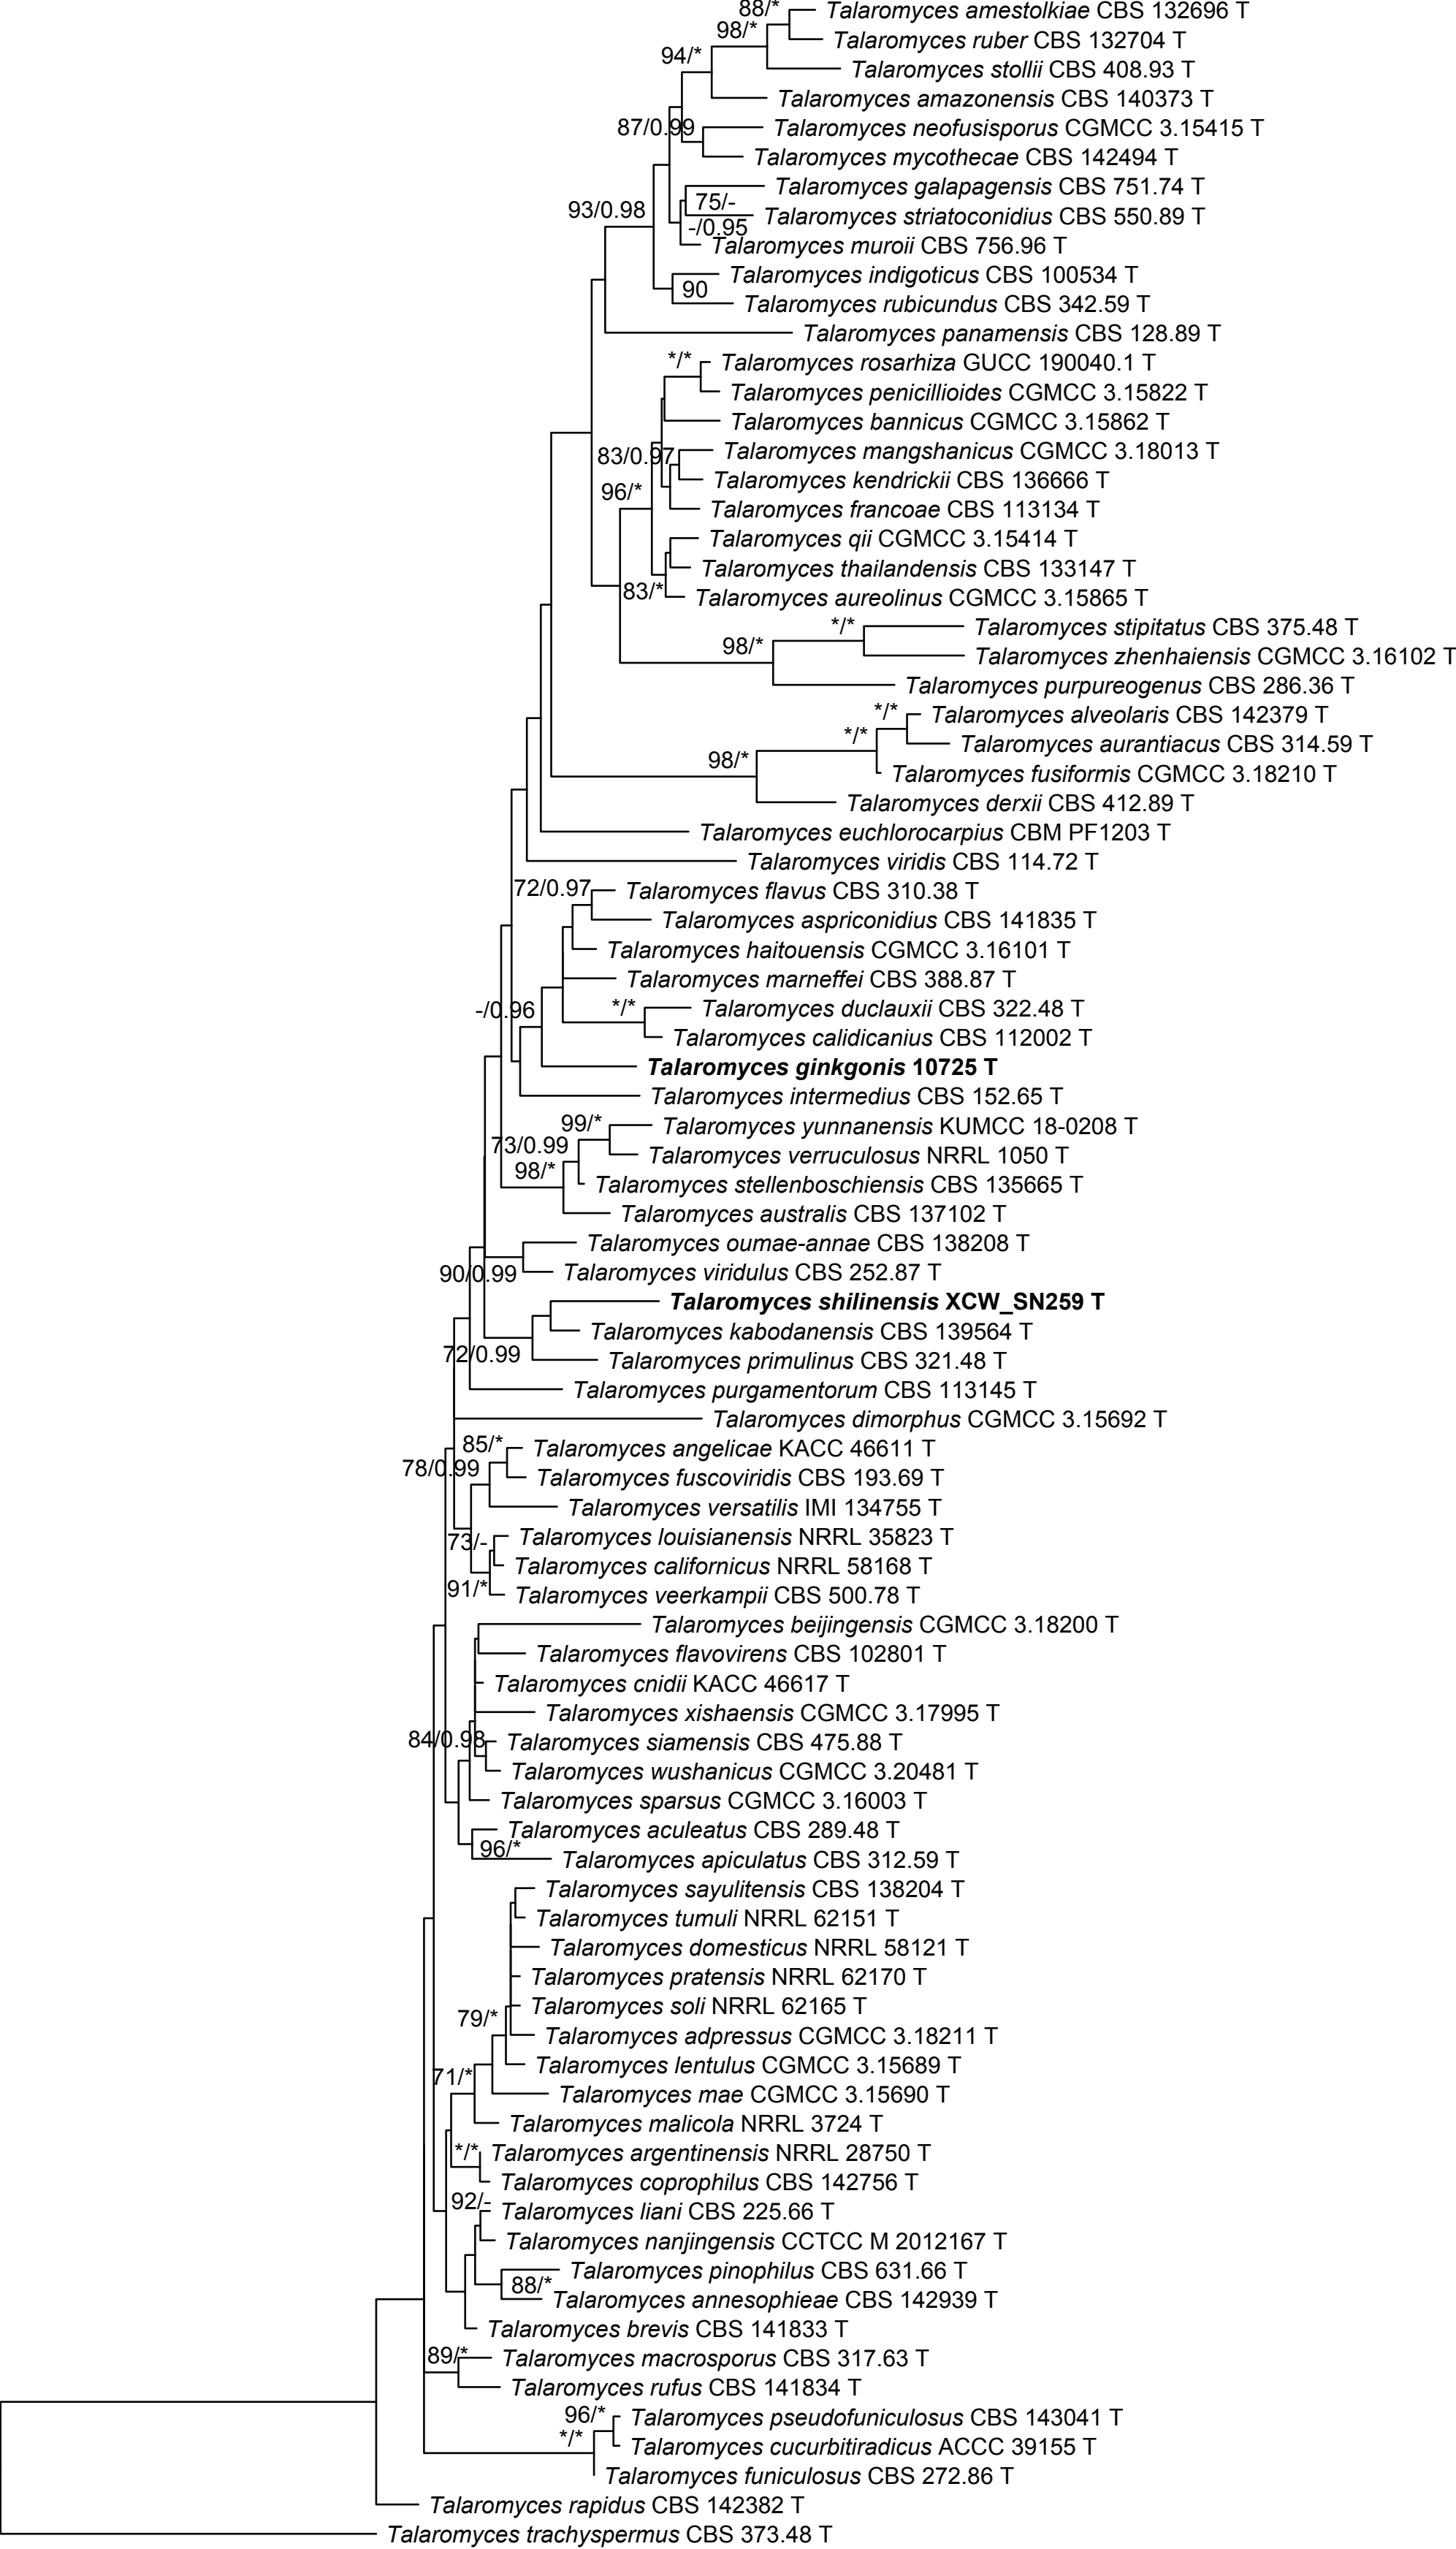

Supplement: s1 [file s1]

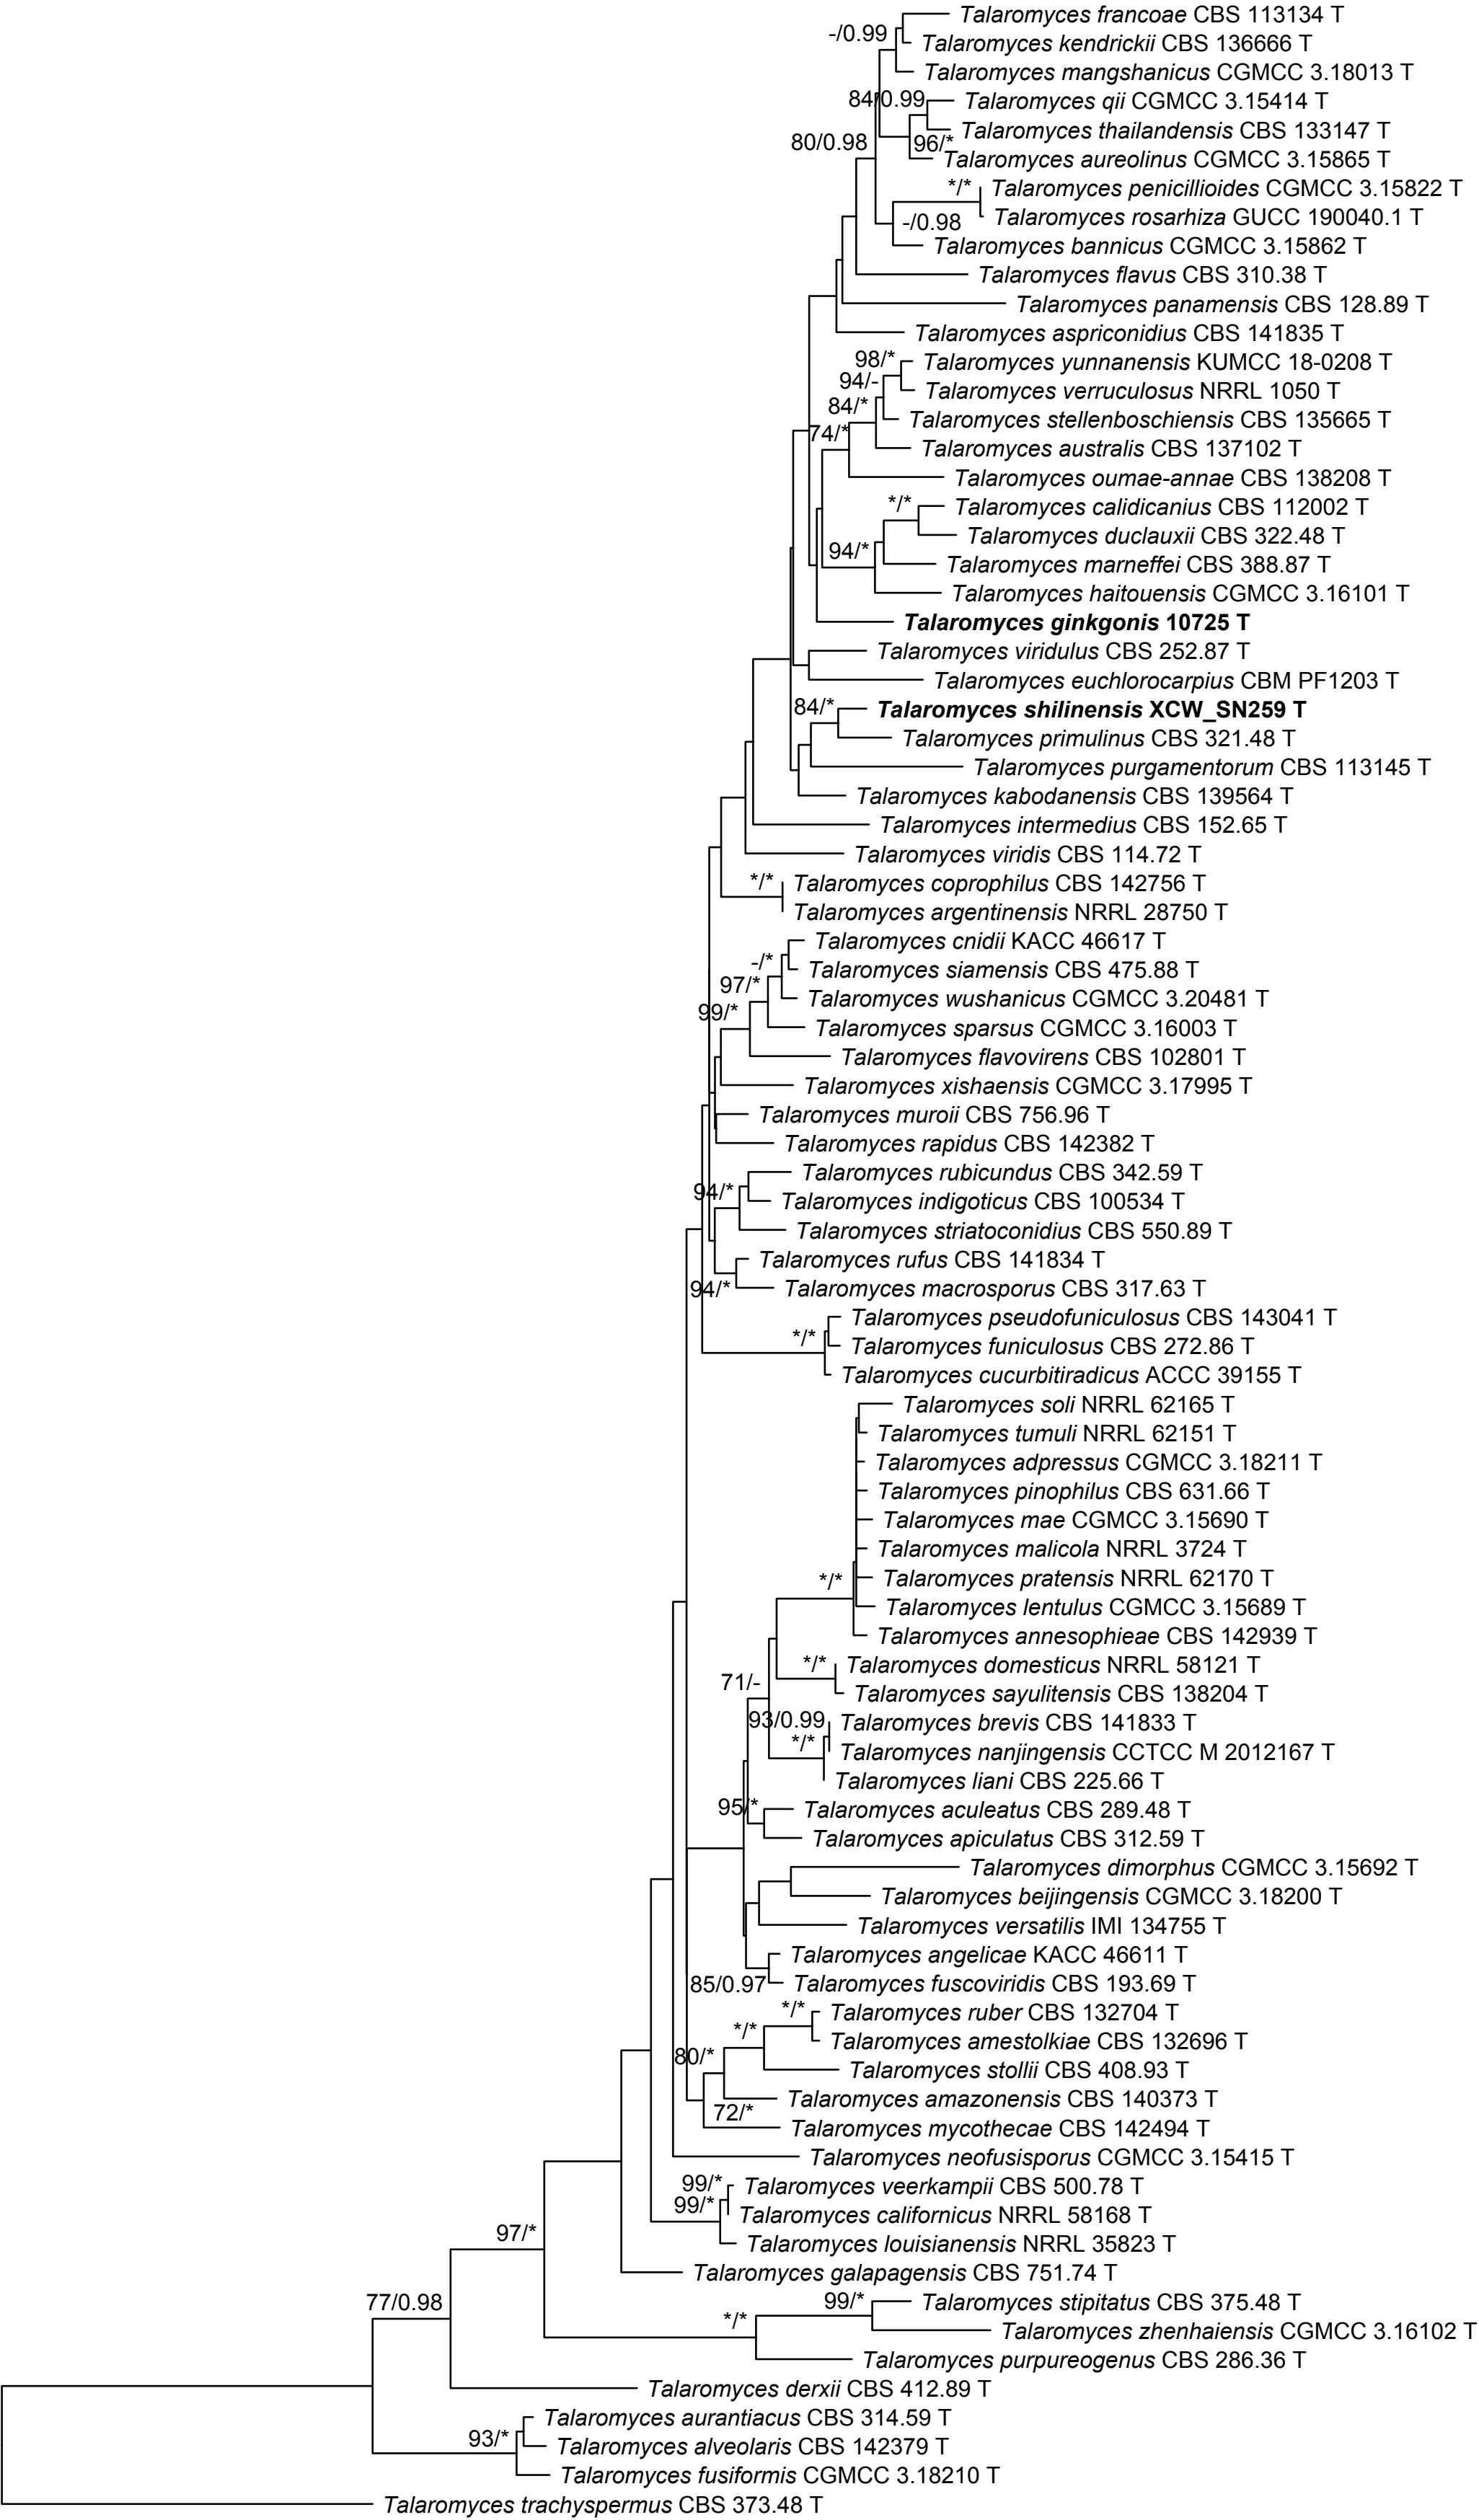

Supplement: s1 [file s1]

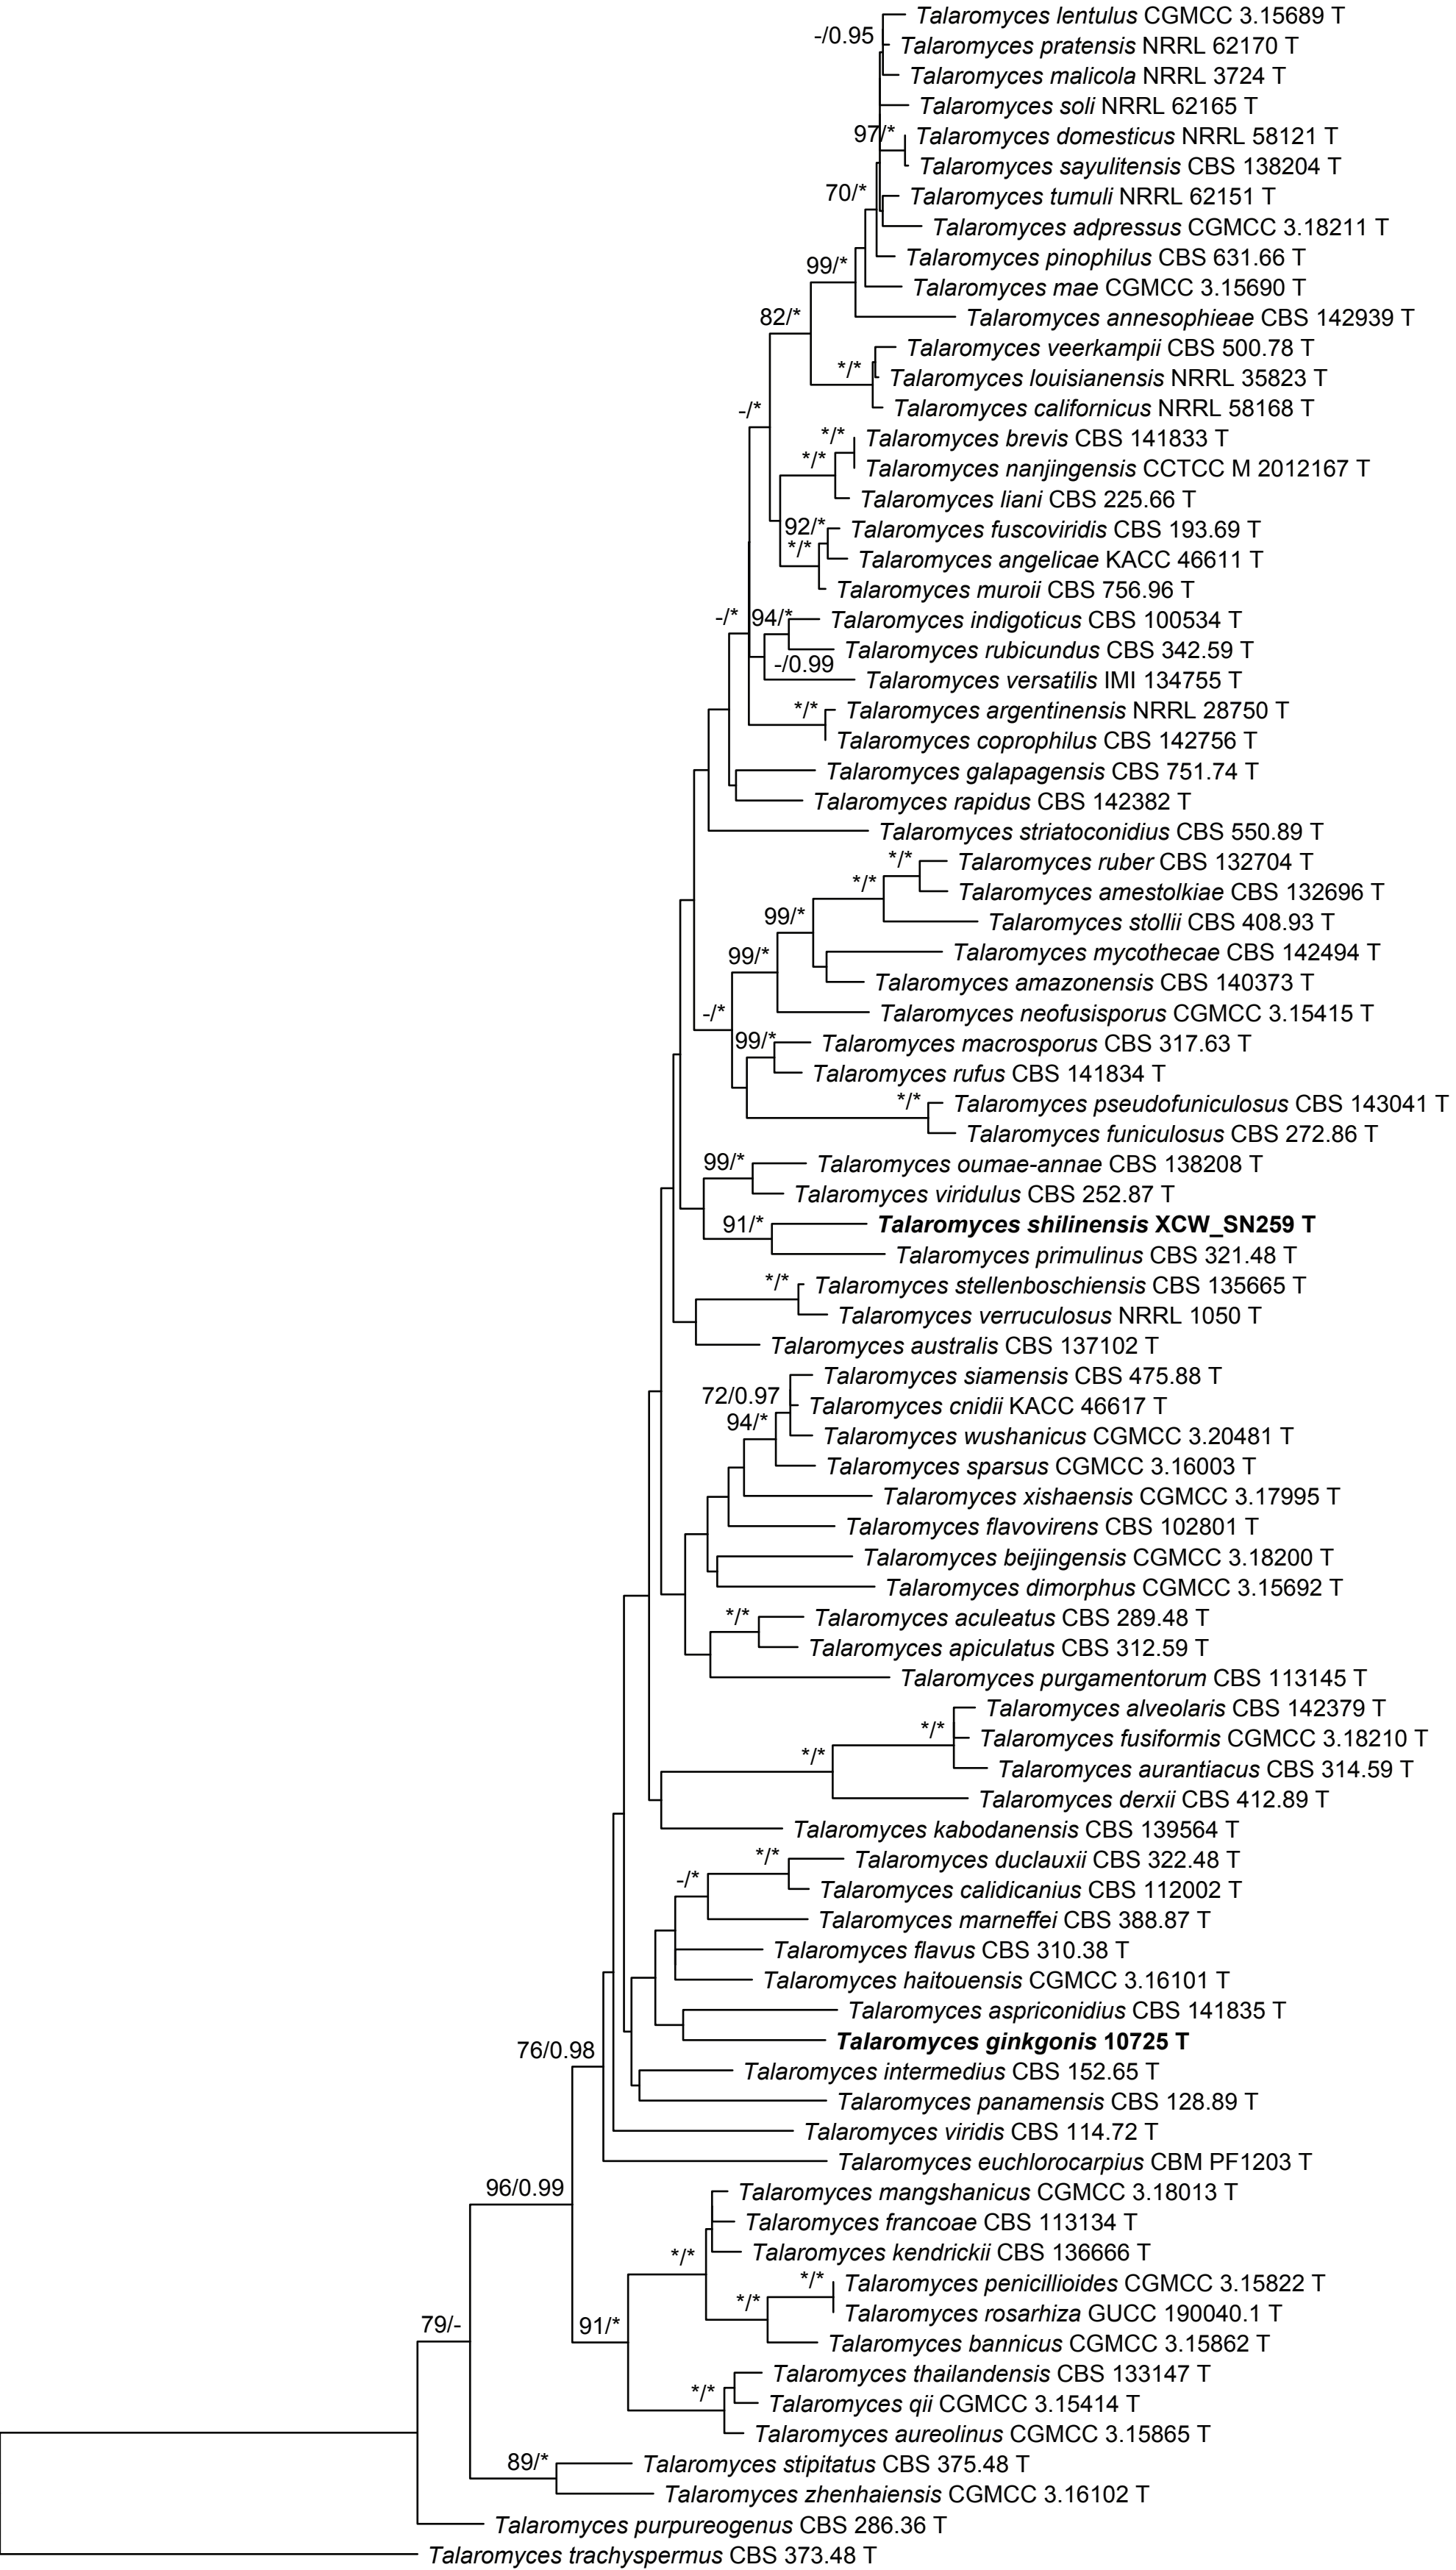

Supplement: s1 [file s1]
